CORRECTION

# Correction: Determinants of Psychosocial Difficulties Experienced by Persons with Brain Disorders: Towards a 'Horizontal Epidemiology' Approach

The *PLOS ONE* Staff

The affiliation for the fourteenth author is incorrect. Anna Chrostek is not affiliated with #5 but with #6, Department of Psychiatry, Institute of Psychiatry and Neurology, Warsaw, Poland.

In addition, the eleventh author's name is misspelled in the PDF version of the article. The correct name is: Piotr Świtaj. The publisher apologizes for the error.

## Reference

1. Sabariego C, Coenen M, Ballert C, Cabello M, Leonardi M, Anczewska M, et al. (2015) Determinants of Psychosocial Difficulties Experienced by Persons with Brain Disorders: Towards a 'Horizontal Epidemiology' Approach. PLoS ONE 10(12): e0141322. doi: [10.1371/journal.pone.0141322](https://doi.org/10.1371/journal.pone.0141322) PMID: [26675663](https://pubmed.ncbi.nlm.nih.gov/26675663/)

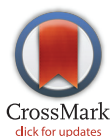

## OPEN ACCESS

**Citation:** The *PLOS ONE* Staff (2016) Correction: Determinants of Psychosocial Difficulties Experienced by Persons with Brain Disorders: Towards a 'Horizontal Epidemiology' Approach. PLoS ONE 11(1): e0146713. doi:10.1371/journal.pone.0146713

**Published:** January 5, 2016

**Copyright:** © 2016 The PLOS ONE Staff. This is an open access article distributed under the terms of the [Creative Commons Attribution License](https://creativecommons.org/licenses/by/4.0/), which permits unrestricted use, distribution, and reproduction in any medium, provided the original author and source are credited.
